# Supplementary material for: A pilot study on biaxial mechanical, collagen microstructural, and morphological characterizations of a resected human intracranial aneurysm tissue
Source: PubMed Central journal article supplement (PMC7876029; doi:10.1038/s41598-021-82991-x), 2021-02-10
Supplement: 41598_2021_82991_MOESM1_ESM.pdf [file 41598_2021_82991_MOESM1_ESM.pdf]

## Supplementary Information

This Supplementary Information section provides the supplemental information for the manuscript “*A pilot study on biaxial mechanical, collagen microstructural, and morphological characterizations of a resected human intracranial aneurysm tissue*” authored by Devin W. Laurence, Hannah Homburg, Feng Yan, Qinggong Tang, Kar-Ming Fung, Bradley N. Bohnstedt, Gerhard A. Holzapfel, and Chung-Hao Lee. Specifically, **Tables S1-S3** provide the model parameters from the 10 optimization replicates for each of the chosen three constitutive models, **Figure S1,S2** provide the region-based analysis of the polarized spatial frequency domain imaging (pSFDI) results, and **Figure S3** provides the comprehensive histological information for the human aneurysm tissue.

**Table S1** – Summary of the constitutive model parameters for the 10 replicates using the Fung-type model (Eq. 1).

| Replicate | Parameter |           |           |           | R <sup>2</sup> |
|-----------|-----------|-----------|-----------|-----------|----------------|
|           | $c$ (kPa) | $c_1$ (-) | $c_2$ (-) | $c_3$ (-) |                |
| 1         | 1.915     | 8.720     | 2.581     | 0.436     | 0.977          |
| 2         | 1.914     | 8.721     | 2.581     | 0.436     | 0.977          |
| 3         | 1.915     | 8.720     | 2.581     | 0.436     | 0.977          |
| 4         | 1.916     | 8.720     | 2.581     | 0.434     | 0.977          |
| 5         | 1.916     | 8.714     | 2.580     | 0.437     | 0.977          |
| 6         | 1.915     | 8.720     | 2.581     | 0.436     | 0.977          |
| 7         | 1.915     | 8.720     | 2.581     | 0.436     | 0.977          |
| 8         | 1.915     | 8.721     | 2.581     | 0.436     | 0.977          |
| 9         | 1.914     | 8.721     | 2.581     | 0.436     | 0.977          |
| 10        | 1.915     | 8.721     | 2.581     | 0.436     | 0.977          |
| Mean      | 1.915     | 8.720     | 2.581     | 0.436     |                |
| SEM       | 0.0002    | 0.0007    | 0.0001    | 2E-04     |                |

**Table S2** – Summary of the constitutive model parameters for the 10 replicates using the Holzapfel-Gasser-Ogden (HGO) model (Eq. 2).

| Replicate | Parameter      |             |           |             |           |                   |                   | R <sup>2</sup> |
|-----------|----------------|-------------|-----------|-------------|-----------|-------------------|-------------------|----------------|
|           | $C_{10}$ (kPa) | $k_1$ (kPa) | $k_2$ (-) | $k_3$ (kPa) | $k_4$ (-) | $\theta_1$ (deg.) | $\theta_2$ (deg.) |                |
| 1         | 3.069          | 2.988       | 1.293     | 3.569       | 4.699     | 59.4              | 30.2              | 0.987          |
| 2         | 3.066          | 2.988       | 1.292     | 3.572       | 4.697     | 59.5              | 30.2              | 0.988          |
| 3         | 2.359          | 3.436       | 1.340     | 4.104       | 4.527     | 58.0              | 29.3              | 0.988          |
| 4         | 2.921          | 3.103       | 1.295     | 3.617       | 4.697     | 59.2              | 30.0              | 0.987          |
| 5         | 3.067          | 2.988       | 1.292     | 3.568       | 4.699     | 59.5              | 30.2              | 0.988          |
| 6         | 5.330          | 2.229       | 1.511     | 1.871       | 5.554     | 58.0              | 30.1              | 0.986          |
| 7         | 3.073          | 2.985       | 1.293     | 3.569       | 4.698     | 59.4              | 30.2              | 0.987          |
| 8         | 3.010          | 2.995       | 1.297     | 3.576       | 4.702     | 59.4              | 30.1              | 0.987          |
| 9         | 3.077          | 2.968       | 1.294     | 3.582       | 4.693     | 59.5              | 30.2              | 0.987          |
| 10        | 3.067          | 2.986       | 1.293     | 3.572       | 4.697     | 59.5              | 30.2              | 0.988          |
| Mean      | 3.067          | 2.986       | 1.293     | 3.572       | 4.697     | 59.1              | 30.0              |                |
| SEM       | 0.246          | 0.184       | 0.089     | 0.093       | 0.022     | 0.2               | 0.1               |                |

**Table S3** – Summary of the constitutive model parameters for the 10 replicates using the Gasser-Ogden-Holzapfel (GOH) model (Eq. 3).

| Replicate | Parameter      |             |           |                |                |                   |                   | R <sup>2</sup> |
|-----------|----------------|-------------|-----------|----------------|----------------|-------------------|-------------------|----------------|
|           | $C_{10}$ (kPa) | $k_1$ (kPa) | $k_1$ (-) | $\kappa_1$ (-) | $\kappa_2$ (-) | $\theta_1$ (deg.) | $\theta_2$ (deg.) |                |
| 1         | 4.031          | 6.702       | 4.384     | 0.251          | 0.031          | 85.0              | 28.7              | 0.984          |
| 2         | 4.015          | 6.637       | 4.371     | 0.251          | 0.030          | 85.0              | 28.8              | 0.983          |
| 3         | 4.019          | 6.631       | 4.371     | 0.251          | 0.030          | 85.0              | 28.8              | 0.983          |
| 4         | 3.998          | 6.622       | 4.359     | 0.250          | 0.029          | 85.0              | 28.8              | 0.985          |
| 5         | 4.015          | 6.636       | 4.373     | 0.251          | 0.030          | 85.0              | 28.8              | 0.984          |
| 6         | 4.013          | 6.648       | 4.373     | 0.251          | 0.030          | 85.0              | 28.7              | 0.983          |
| 7         | 4.092          | 7.117       | 4.533     | 0.255          | 0.041          | 85.0              | 27.9              | 0.984          |
| 8         | 3.687          | 7.240       | 4.333     | 0.252          | 0.033          | 84.7              | 28.2              | 0.983          |
| 9         | 4.016          | 6.632       | 4.370     | 0.251          | 0.030          | 85.0              | 28.8              | 0.983          |
| 10        | 4.038          | 6.629       | 4.380     | 0.251          | 0.030          | 85.0              | 28.7              | 0.984          |
| Mean      | 3.992          | 6.750       | 4.385     | 0.251          | 0.032          | 85.0              | 28.6              |                |
| SEM       | 0.035          | 0.072       | 0.017     | 0.000          | 0.001          | 0.0               | 0.1               |                |

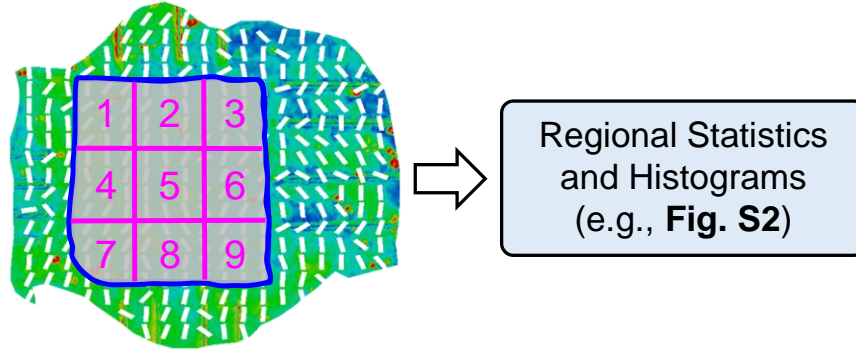

**Figure S1** – Tissue’s region of interest divided into nine sub-regions, with data from each sub-region used to create the regional histograms (**Fig. S2**) and statistics (**Tables S4,S5**).

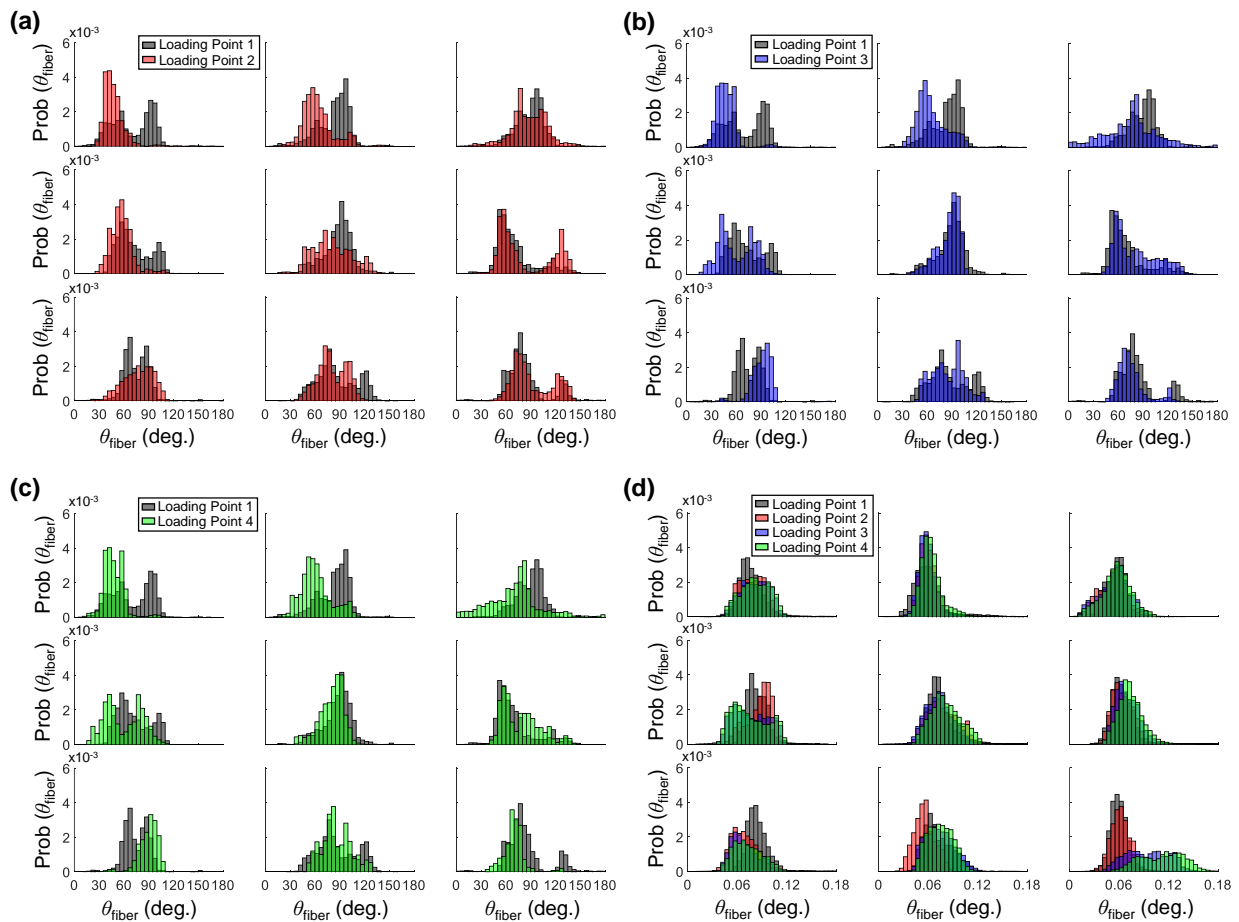

**Figure S2** – Regional analysis of the collagen fiber architecture quantified from the pSFDI method for the equibiaxial tension protocol ( $F_X : F_Y = 1 : 1$ ): comparisons of the preferred fiber orientation of *Loading Point 1* (i.e., the unloaded configuration) with (a) *Loading Point 2*, (b) *Loading Point 3*, and (c) *Loading Point 4*. (d) Comparison of the degree of optical anisotropy (DOA) for all four loading points.

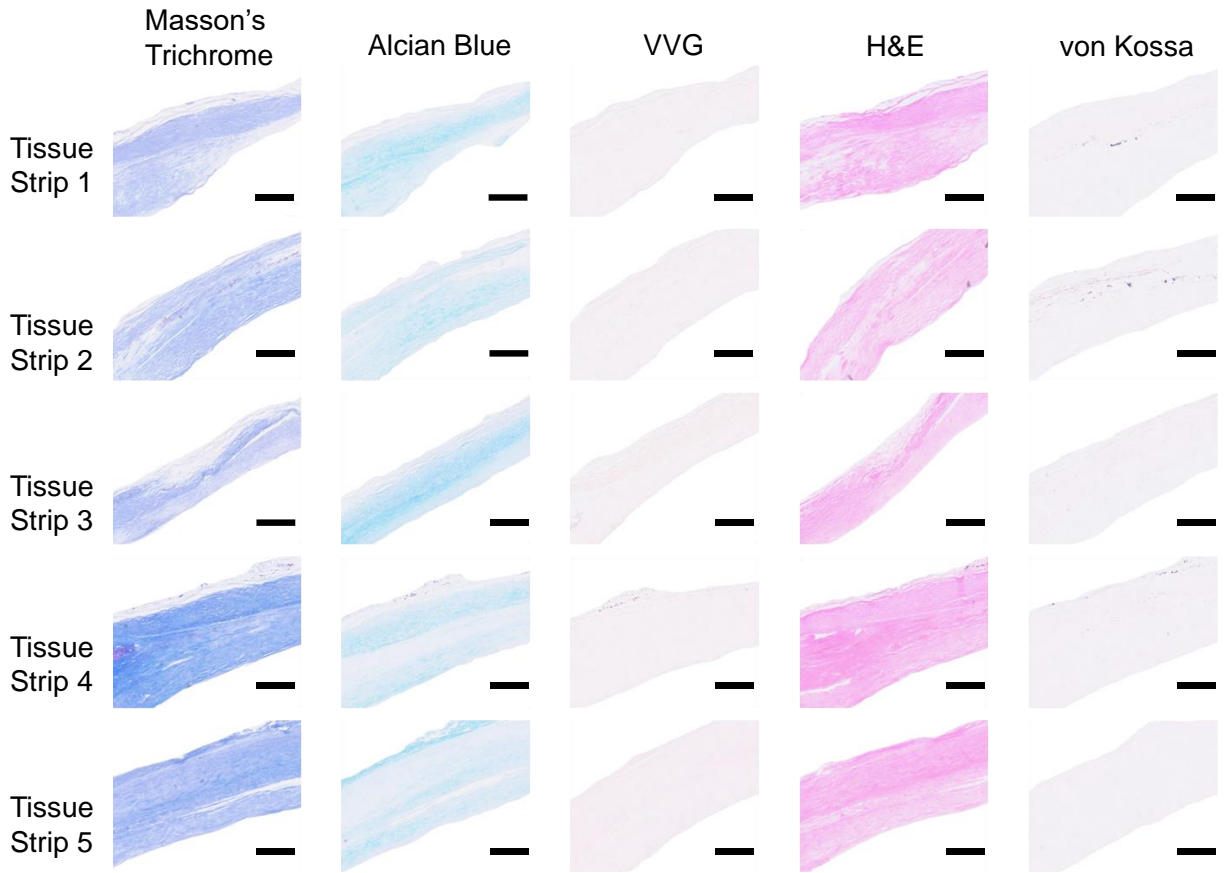

**Figure S3** – Histology micrographs for all five histology tissue strips (see the definition in **Fig. 6f**), considering all five stains used in this study. The scale bar denotes 100  $\mu$ m.
